# Supplementary material for: Activation of endothelial β-catenin signaling induces heart failure
Source: PubMed Central journal article supplement (PMC4857119; doi:10.1038/srep25009), 2016-05-05
Supplement: srep25009-s1.pdf [file srep25009-s1.pdf]

Supplementary Information for SREP-15-36660A

**Activation of endothelial  $\beta$ -catenin signaling induces heart failure.**

Akito Nakagawa, Atsuhiko T. Naito, Tomokazu Sumida, Seitaro Nomura, Masato Shibamoto, Tomoaki Higo, Katsuki Okada, Taku Sakai, Akihito Hashimoto, Yuki Kuramoto, Toru Oka, Jong-Kook Lee, Mutsuo Harada, Kazutaka Ueda, Ichiro Shiojima, Florian P. Limbourg, Ralf H Adams, Tetsuo Noda, Yasushi Sakata, Hiroshi Akazawa, & Issei Komuro

Supplemental Table 1., Nakagawa et al.

## Echocardiographic parameters of Ctrl and Bmx/CA mice after tamoxifen treatment.

|                |               | LVFS  |       |         | LVDd (mm) |       |         | HR (bpm) |       |         |
|----------------|---------------|-------|-------|---------|-----------|-------|---------|----------|-------|---------|
|                |               | mean  | SEM   | p-value | mean      | SEM   | p-value | mean     | SEM   | p-value |
| pre            | Ctrl (n=21)   | 0.599 | 0.013 | 0.698   | 2.964     | 0.032 | 0.084   | 666.52   | 11.65 | < 0.01  |
|                | Bmx/CA (n=23) | 0.604 | 0.012 |         | 3.041     | 0.029 |         | 641.17   | 7.87  |         |
| 8w (Tam3)      | Ctrl (n=21)   | 0.600 | 0.008 | < 0.01  | 2.920     | 0.038 | < 0.01  | 674.00   | 6.44  | 0.860   |
|                | Bmx/CA (n=23) | 0.514 | 0.011 |         | 3.110     | 0.031 |         | 670.13   | 7.11  |         |
| 8w (Tam5)      | Ctrl (n=21)   | 0.599 | 0.010 | < 0.01  | 3.026     | 0.039 | < 0.01  | 647.81   | 7.37  | 0.805   |
|                | Bmx/CA (n=23) | 0.462 | 0.013 |         | 3.323     | 0.051 |         | 652.09   | 8.66  |         |
| 9w (post day3) | Ctrl (n=21)   | 0.600 | 0.010 | < 0.01  | 3.059     | 0.024 | < 0.01  | 662.67   | 7.58  | 0.481   |
|                | Bmx/CA (n=23) | 0.459 | 0.011 |         | 3.368     | 0.044 |         | 670.74   | 6.22  |         |
| 10w            | Ctrl (n=21)   | 0.622 | 0.011 | < 0.01  | 3.023     | 0.027 | < 0.01  | 687.52   | 6.53  | 0.418   |
|                | Bmx/CA (n=23) | 0.495 | 0.014 |         | 3.349     | 0.044 |         | 681.52   | 5.27  |         |
| 12w            | Ctrl (n=21)   | 0.621 | 0.009 | < 0.01  | 3.011     | 0.026 | < 0.01  | 675.86   | 6.40  | 0.250   |
|                | Bmx/CA (n=23) | 0.439 | 0.014 |         | 3.433     | 0.044 |         | 664.35   | 4.52  |         |
| 16w            | Ctrl (n=21)   | 0.599 | 0.009 | < 0.01  | 3.122     | 0.040 | < 0.01  | 678.71   | 5.59  | < 0.05  |
|                | Bmx/CA (n=23) | 0.415 | 0.013 |         | 3.587     | 0.046 |         | 658.83   | 7.40  |         |
| 20w            | Ctrl (n=21)   | 0.584 | 0.008 | < 0.01  | 3.150     | 0.027 | < 0.01  | 672.38   | 5.40  | 0.280   |
|                | Bmx/CA (n=23) | 0.377 | 0.010 |         | 3.802     | 0.059 |         | 663.17   | 6.47  |         |
| 24w            | Ctrl (n=21)   | 0.596 | 0.010 | < 0.01  | 3.163     | 0.032 | < 0.01  | 668.05   | 8.57  | 0.331   |
|                | Bmx/CA (n=23) | 0.365 | 0.010 |         | 4.040     | 0.094 |         | 662.27   | 6.60  |         |
| 28w            | Ctrl (n=21)   | 0.578 | 0.006 | < 0.01  | 3.197     | 0.021 | < 0.01  | 672.52   | 7.69  | 0.474   |
|                | Bmx/CA (n=23) | 0.323 | 0.014 |         | 4.225     | 0.099 |         | 664.95   | 6.24  |         |
| 32w            | Ctrl (n=21)   | 0.581 | 0.009 | < 0.01  | 3.177     | 0.044 | < 0.01  | 658.33   | 10.00 | 0.395   |
|                | Bmx/CA (n=23) | 0.293 | 0.012 |         | 4.464     | 0.133 |         | 653.09   | 6.63  |         |
| 40w            | Ctrl (n=3)    | 0.599 | 0.009 | < 0.01  | 2.870     | 0.040 | < 0.01  | 681.67   | 4.33  | 0.165   |
|                | Bmx/CA (n=3)  | 0.415 | 0.013 |         | 4.330     | 0.163 |         | 650.67   | 17.74 |         |
| 48w            | Ctrl (n=3)    | 0.584 | 0.008 | < 0.01  | 2.990     | 0.020 | < 0.01  | 496.33   | 18.85 | < 0.05  |
|                | Bmx/CA (n=3)  | 0.377 | 0.010 |         | 5.333     | 0.283 |         | 564.00   | 14.15 |         |
| 52w            | Ctrl (n=2)    | 0.596 | 0.010 | < 0.01  | 2.895     | 0.055 | 0.053   | 513.50   | 13.50 | 0.053   |
|                | Bmx/CA (n=5)  | 0.365 | 0.010 |         | 5.468     | 0.437 |         | 616.20   | 14.94 |         |
| 56w            | Ctrl (n=2)    | 0.578 | 0.006 | < 0.01  | 2.840     | 0.030 | 0.083   | 646.50   | 31.50 | 0.564   |
|                | Bmx/CA (n=3)  | 0.323 | 0.014 |         | 5.787     | 0.712 |         | 632.00   | 18.18 |         |
| 60w            | Ctrl (n=5)    | 0.581 | 0.009 | < 0.01  | 3.106     | 0.103 | < 0.05  | 674.20   | 10.57 | < 0.05  |
|                | Bmx/CA (n=4)  | 0.293 | 0.012 |         | 7.415     | 0.513 |         | 444.00   | 71.00 |         |

Supplemental Table 2., Nakagawa et al.

Echocardiographic parameters of Ctrl and Bmx/CA mice treated with or without rNRG protein.

|          |                     | LVFS  |       |                    |          | LVDd  |       |   |          | HR    |      |   |          |
|----------|---------------------|-------|-------|--------------------|----------|-------|-------|---|----------|-------|------|---|----------|
|          |                     | mean  | SEM   |                    |          | mean  | SEM   |   |          | mean  | SEM  |   |          |
| pre      | Ctrl (n=15)         | 0.638 | 0.007 | Ctrl vs Bmx/CA (*) | NS       | 2.917 | 0.032 | * | NS       | 629.7 | 10.6 | * | NS       |
|          | Bmx/CA (n=9)        | 0.618 | 0.011 | Ctrl vs rNRG (§)   | NS       | 2.944 | 0.059 | § | NS       | 590.9 | 15.5 | § | NS       |
|          | Bmx/CA + rNRG (n=9) | 0.629 | 0.007 | Bmx/CA vs rNRG (†) | NS       | 2.984 | 0.043 | † | NS       | 630.1 | 16.7 | † | NS       |
| Tam d3   | Ctrl (n=15)         | 0.642 | 0.006 | *                  | P < 0.01 | 2.957 | 0.031 | * | P < 0.01 | 654.3 | 10.0 | * | NS       |
|          | Bmx/CA (n=9)        | 0.503 | 0.012 | §                  | NS       | 3.190 | 0.045 | § | NS       | 653.8 | 8.2  | § | NS       |
|          | Bmx/CA + rNRG (n=9) | 0.628 | 0.013 | †                  | P < 0.01 | 3.041 | 0.048 | † | NS       | 626.1 | 11.3 | † | NS       |
| Tam d5   | Ctrl (n=15)         | 0.634 | 0.008 | *                  | P < 0.01 | 2.961 | 0.026 | * | P < 0.05 | 636.6 | 9.2  | * | NS       |
|          | Bmx/CA (n=9)        | 0.459 | 0.015 | §                  | NS       | 3.222 | 0.088 | § | P < 0.05 | 638.7 | 7.6  | § | P < 0.05 |
|          | Bmx/CA + rNRG (n=9) | 0.626 | 0.013 | †                  | P < 0.01 | 3.099 | 0.041 | † | NS       | 600.8 | 9.3  | † | P < 0.05 |
| pTam d3  | Ctrl (n=15)         | 0.643 | 0.007 | *                  | P < 0.01 | 2.942 | 0.028 | * | P < 0.01 | 675.1 | 5.1  | * | NS       |
|          | Bmx/CA (n=9)        | 0.453 | 0.017 | §                  | P < 0.05 | 3.373 | 0.073 | § | NS       | 680.1 | 10.2 | § | NS       |
|          | Bmx/CA + rNRG (n=9) | 0.607 | 0.009 | †                  | P < 0.01 | 3.080 | 0.049 | † | P < 0.05 | 648.4 | 11.3 | † | NS       |
| pTam d6  | Ctrl (n=15)         | 0.656 | 0.011 | *                  | P < 0.01 | 2.876 | 0.032 | * | P < 0.01 | 680.9 | 7.6  | * | NS       |
|          | Bmx/CA (n=9)        | 0.428 | 0.016 | §                  | P < 0.05 | 3.420 | 0.088 | § | P < 0.01 | 649.6 | 32.5 | § | P < 0.01 |
|          | Bmx/CA + rNRG (n=9) | 0.607 | 0.014 | †                  | P < 0.01 | 3.090 | 0.037 | † | P < 0.01 | 634.7 | 10.9 | † | NS       |
| pTam d11 | Ctrl (n=15)         | 0.638 | 0.009 | *                  | P < 0.01 | 2.974 | 0.041 | * | P < 0.01 | 696.1 | 6.0  | * | NS       |
|          | Bmx/CA (n=9)        | 0.437 | 0.012 | §                  | P < 0.05 | 3.523 | 0.080 | § | P < 0.05 | 678.4 | 13.0 | § | P < 0.01 |
|          | Bmx/CA + rNRG (n=9) | 0.599 | 0.016 | †                  | P < 0.01 | 3.220 | 0.062 | † | P < 0.05 | 634.1 | 11.8 | † | P < 0.05 |
| pTam d14 | Ctrl (n=15)         | 0.649 | 0.005 | *                  | P < 0.01 | 2.946 | 0.048 | * | P < 0.01 | 703.0 | 6.7  | * | NS       |
|          | Bmx/CA (n=9)        | 0.421 | 0.007 | §                  | NS       | 3.456 | 0.108 | § | P < 0.01 | 706.7 | 12.0 | § | P < 0.01 |
|          | Bmx/CA + rNRG (n=9) | 0.604 | 0.020 | †                  | P < 0.01 | 3.204 | 0.052 | † | NS       | 639.0 | 7.7  | † | P < 0.01 |
| pTam d18 | Ctrl (n=15)         | 0.633 | 0.008 | *                  | P < 0.01 | 2.975 | 0.033 | * | P < 0.01 | 704.2 | 5.6  | * | NS       |
|          | Bmx/CA (n=9)        | 0.411 | 0.007 | §                  | P < 0.05 | 3.447 | 0.083 | § | P < 0.05 | 703.3 | 7.7  | § | P < 0.01 |
|          | Bmx/CA + rNRG (n=9) | 0.605 | 0.004 | †                  | P < 0.01 | 3.213 | 0.085 | † | NS       | 636.3 | 9.4  | † | P < 0.01 |

Supplemental Table 3., Nakagawa et al.

Primer sequences and UPL numbers used for qRT-PCR.

| <b>Gene name</b> | species | probe number | Fwd/Rev | sequences              |
|------------------|---------|--------------|---------|------------------------|
| <b>Gapdh</b>     | mouse   | 80           | Fwd     | tgtccgctcgtggatctgac   |
|                  |         |              | Rev     | cctgcttcaccaccttcttg   |
| <b>Gapdh</b>     | human   | 63           | Fwd     | ccccggttctataaattgagc  |
|                  |         |              | Rev     | cacctccccatggtgtct     |
| <b>Axin2</b>     | mouse   | 96           | Fwd     | gagagtgagcggcagagc     |
|                  |         |              | Rev     | cggtgactcgttctcct      |
| <b>Axin2</b>     | human   | 50           | Fwd     | ccacacccttctcaatcc     |
|                  |         |              | Rev     | tgccagttctttggctctt    |
| <b>Lef1</b>      | mouse   | 94           | Fwd     | accggtgatgggataaacag   |
|                  |         |              | Rev     | tcctgaaatccccaccttc    |
| <b>Nrg1</b>      | mouse   | 29           | Fwd     | tctgaccgaaggctctgc     |
|                  |         |              | Rev     | ggcctactgcaaaaccaaga   |
| <b>Nrg1</b>      | human   | 7            | Fwd     | aactgctgaggggatggtc    |
|                  |         |              | Rev     | acttctcgtgacaccaccaa   |
| <b>Nppa</b>      | mouse   | 25           | Fwd     | cctcatcttaccggcatc     |
|                  |         |              | Rev     | cacagatctgatggattcaaga |
| <b>Nppb</b>      | mouse   | 71           | Fwd     | agaccaggcagagtcagaa    |
|                  |         |              | Rev     | gtcagtcgttgggctgtaac   |
| <b>Col1a1</b>    | mouse   | 15           | Fwd     | gcagctgactcagggatg     |
|                  |         |              | Rev     | agacatgttcagcttgggac   |
| <b>Col3a1</b>    | mouse   | 49           | Fwd     | tcccctggaatctgtaatc    |
|                  |         |              | Rev     | tgagtcaattggggagaat    |

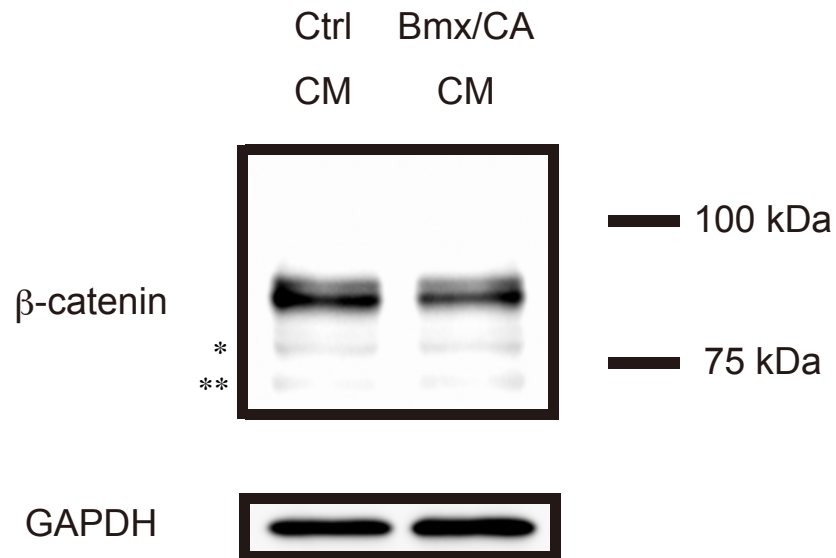

**Supplemental Figure S1.  $\beta$ -catenin protein in the cardiomyocytes of Bmx/CA mice**

Cardiomyocytes were isolated by langendorff perfusion apparatus and the expression of  $\beta$ -catenin protein was analyzed by western blotting.  $\beta$ -catenin protein lacking exon3 (= 75 kDa) was not detected in the cardiomyocytes from Ctrl and Bmx/CA mice. \* and \*\*, non-specific bands.

Supplemental Figure S2., Nakagawa et al.

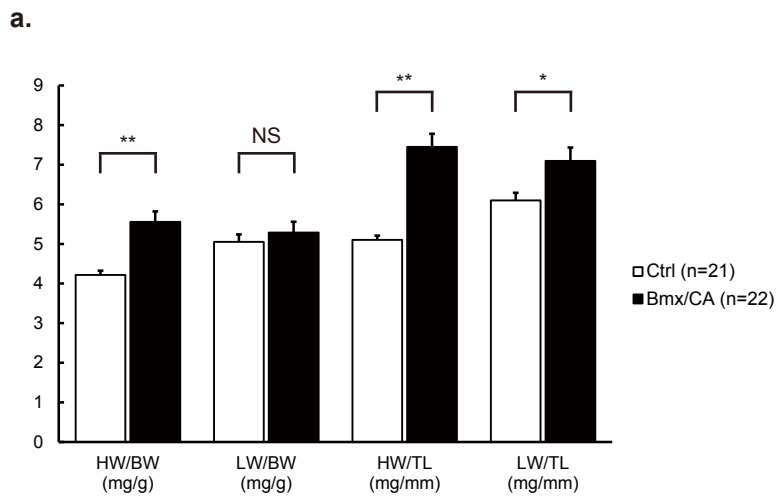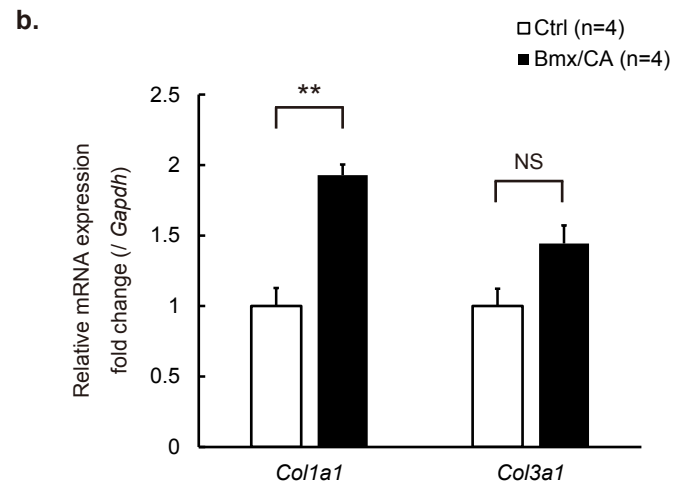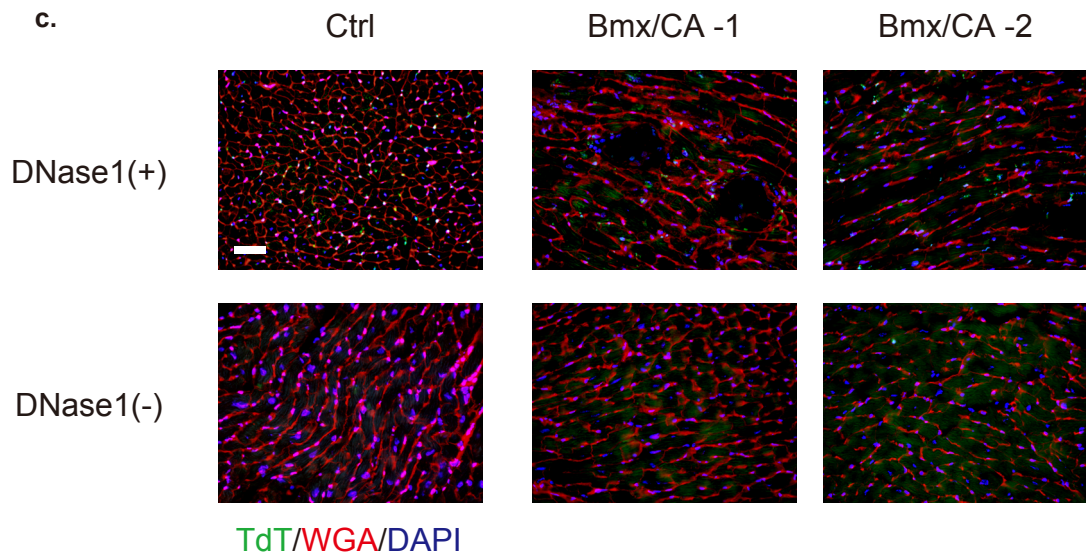

d.

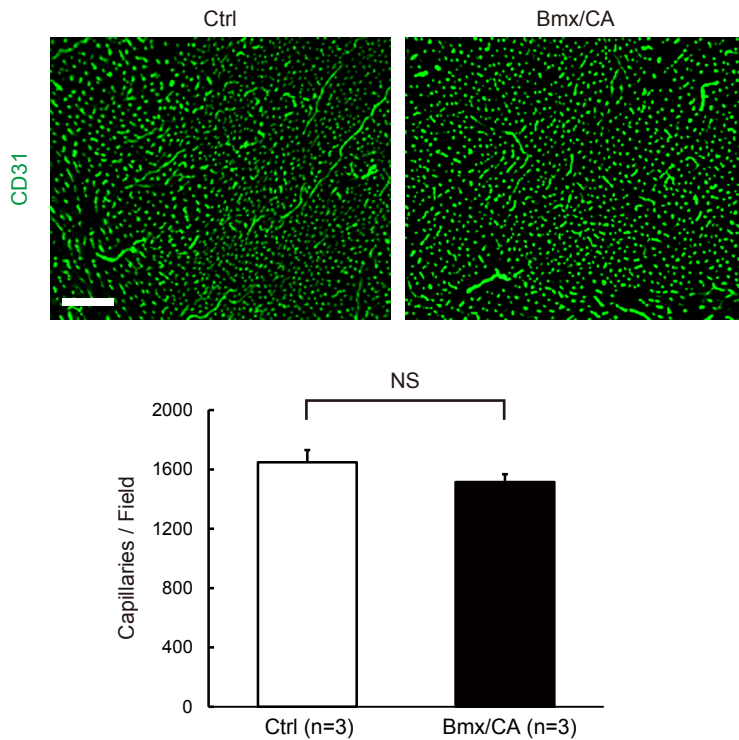

e.

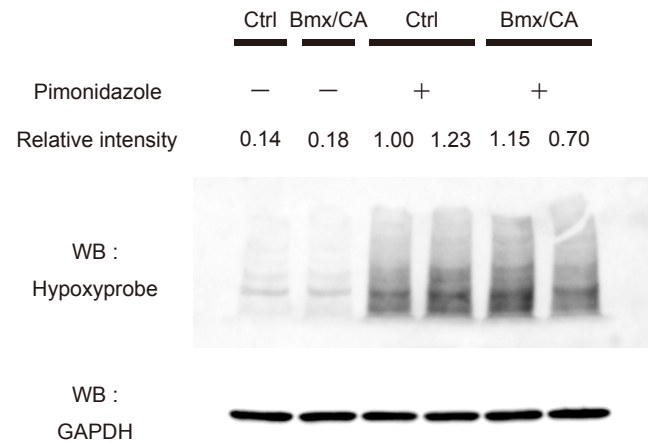

### Supplemental Figure S2. Heart failure in Bmx/CA mice.

(a) Lung weight/Body weight ratio (LW/BW), Heart weight/Body weight ratio (HW/BW), Heart weight/Tibia length ratio (HW/TL) and Lung weight/Tibia length ratio (LW/TL) of Ctrl and Bmx/CA mice were examined at 6 months after TAM treatment. \*\* P<0.01, \* P<0.05 versus Ctrl. (b) Quantitative RT-PCR analysis of the fibrosis related genes. Expression levels of Col1a1 and Col3a1 were examined at 6 months after TAM treatment. \*\* P<0.01 versus Ctrl. (c) TUNEL staining of heart tissues from Ctrl and Bmx/CA mice 6 months after TAM treatment. DNase1 were used for positive control. No staining was observed in the heart of both Ctrl and Bmx/CA mice. Scale bar: 50  $\mu$ m. (d) Immunofluorescent staining of heart tissues for CD31 (green). The capillary vessels in Ctrl and Bmx/CA hearts were counted on 10 randomly selected fields (533  $\times$  667  $\mu$ m<sup>2</sup>). Scale bar: 100  $\mu$ m. (e) Pimonidazole binds to thiol-containing proteins specifically in hypoxic cells. Tissue hypoxia was assessed by calculating the band intensity of anti-pimonidazole antibody reacting protein. Band density was calculated using ImageJ.
